# Supplementary material
Source: Springer Nature journal article supplement (https://www.springermedizin.de/resource/supplementary/13063_2013_1941_MOESM1_ESM.pdf/9622036)
Supplement: MOESM1 [file 9622036]

**Additional file 1. The Eight E-learning Modules of the Mental Health Online Program.**

---

| <b>Module</b>                                | <b>Aim</b>                                                                                                                                                                                  |
|----------------------------------------------|---------------------------------------------------------------------------------------------------------------------------------------------------------------------------------------------|
| 1. Suicidality among adolescents             | Gives an overall introduction to the subject of adolescent suicidality and provides the gatekeeper with valuable information on this topic                                                  |
| 2. Risk factors                              | The most common and important risk factors which underlie adolescent suicidality are discussed                                                                                              |
| 3. Ethnicity                                 | Discusses the relationship between ethnicity and adolescent suicidality, and provides the gatekeeper with the required skills when interacting with adolescents from ethnic minority groups |
| 4. Recognition of suicidality                | The most important and common warning signs associated with adolescent suicidality are discussed                                                                                            |
| 5. Conversation with the suicidal adolescent | The gatekeeper is provided with a framework and the skills required when engaging in a conversation with a suicidal adolescent                                                              |
| 6. Conversation with the parents             | Important steps and skills are provided regarding when and how to engage in a conversation with the parents of a suicidal adolescent                                                        |
| 7. Suicide first-aid                         | Discusses how to give first-aid to an adolescent who has attempted suicide                                                                                                                  |
| 8. Care and aftercare (for schools)          | A module specially designed for schools which offers them guidelines regarding the process of care and aftercare when an adolescent commits or attempts suicide                             |

---
